# Supplementary material for: Preservation affinity in consensus modules among stages of HIV-1 progression
Source: BMC Bioinformatics. 2017 Mar 20;18:181. doi: 10.1186/s12859-017-1590-3 (PMC5359929; doi:10.1186/s12859-017-1590-3)
Supplement: Additional file 13 — List of immune regulatory genes preserved in consensus modules in each category. (XLSX 9.80 kb) [file 12859_2017_1590_MOESM13_ESM.xlsx]

## Sheet: Gene Details
List of Immune Regulatory Genes Preserved in Consensus Modules in Each Category
List of Immune Regulatory Genes Preserved in Category1 (Acute-Chronic Pair) [24]	List of Immune Regulatory Genes Preserved in Category2 (Chronic-Non Progressor Pair) [8]	List of Immune Regulatory Genes Preserved in Category3 (Acute-Non Progressor Pair) [48]
'AKAP11'	'FASTKD5'	'ABCE1'
'BCL2'	'HLA-B'	'ACSL4'
'CD44'	'HLA-E'	'API5'
'CD63'	'HLA-G'	'AREG'
'CD84'	'LAT'	'CASP1'
'CTBP1'	'PSMD4'	'CASP6'
'CX3CR1'	'RPS6'	'CD160'
'EXOC1'	'VAMP3'	'CD28'
'GADD45A'		'CD3D'
'HDAC1'		'CD47'
'HLA-DPB1'		'CD59'
'HLA-DQB1'		'CD6'
'HMGB1'		'CDKN1B'
'LITAF'		'CFL1'
'MLLT3'		'EHD1'
'OPA1'		'FKBP11'
'PAK2'		'FLNA'
'RPS6'		'FYN'
'STAT1'		'GZMK'
'TAB2'		'HIVEP2'
'TCF7'		'HLA-DRA'
'TIA1'		'INPP5D'
'XBP1'		'MAX'
'ZEB1'		'NECAP2'
		'NIPBL'
		'PDGFD'
		'PDIA3'
		'PIK3CB'
		'PLCG1'
		'PRKACB'
		'PRKCH'
		'PRNP'
		'PSMB10'
		'PSMB8'
		'PTPRE'
		'RAB22A'
		'RAB27A'
		'RAD21'
		'RPS3A'
		'SCFD1'
		'SLAMF1'
		'SMAD4'
		'TIA1'
		'TNFSF10'
		'TRIB2'
		'TUBB4B'
		'VKORC1'
		'YBX1'
